# Supplementary material
Source: publisher site journal article supplement (https://www.dovepress.com/article/399644)
Supplement: Supplementary file 1 [file get_supplementary_file.php]

**Supplementary Materials:**

The overall MoCA score did not correlate with the remaining objective sleep quality parameters, including arousals (*r(*20) = .19, *p* = .390, 95% C.I. [-0.25, 0.57]; *q* = .036) and sleep-stage transitions (*r*(20) = 0.16, *p* = .480, 95% C.I. [-0.28, 0.54]; *q* = .043), representing sleep fragmentation, and deep sleep, reflecting slow-wave sleep (*r*(20) = .14, *p* = .599, 95% C.I. [-0.30, 0.53]; *q* = .050).


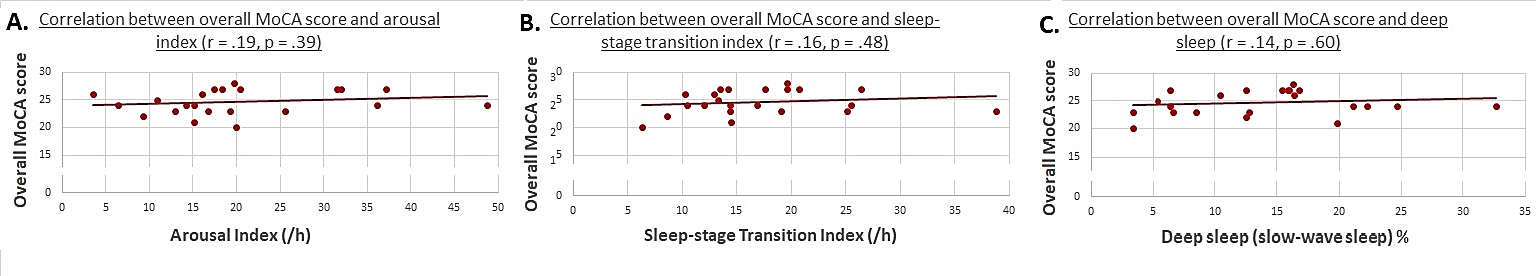


***Supplementary Figure 1:*** *Correlation between overall MoCA score and arousals (A); sleep-stage transitions (B); and slow-wave sleep (C).*
